# Supplementary material for: Why do crystal structures waste molecular inversion symmetry?
Source: Royal Society of Chemistry journal article supplement (doi:10.1039/c001341b), 2010-01-01
Supplement: c001341b.pdf [file c001341b.pdf]

**Table S1. Frequency of structural classes amongst the 197 structures retained for analysis**

|                           |    |
|---------------------------|----|
| P 21/c, Z = 4 (1)         | 84 |
| P n m a, Z = 4 (m)        | 18 |
| P 21/c, Z = 6 (1, -1)     | 16 |
| P c a 21, Z = 4 (1)       | 12 |
| P n a 21, Z = 4 (1)       | 11 |
| P 21 21 21, Z = 4 (1)     | 11 |
| P b c a, Z = 8 (1)        | 7  |
| P -1, Z = 3 (1, -1)       | 7  |
| C c, Z = 8 (1, 1)         | 4  |
| P 21, Z = 2 (1)           | 2  |
| P -3, Z = 3 (3, -3)       | 2  |
| P 21, Z = 4 (1, 1)        | 2  |
| P -1, Z = 4 (1, 1)        | 2  |
| P b c n, Z = 8 (1)        | 1  |
| P 41 21 2, Z = 8 (1)      | 1  |
| C 2/c, Z = 16 (1, 1)      | 1  |
| C m c m, Z = 4 (m m 2)    | 1  |
| P 3 1 c, Z = 6 (1)        | 1  |
| R -3, Z = 54 (1, 1, 1)    | 1  |
| I 41 c d, Z = 8 (2)       | 1  |
| P 41, Z = 4 (1)           | 1  |
| P c, Z = 4 (1, 1)         | 1  |
| C 2/c, Z = 4 (2)          | 1  |
| P 4/n n c, Z = 4 (4)      | 1  |
| P 21/c, Z = 8 (1, -1, -1) | 1  |
| P b c m, Z = 4 (m)        | 1  |
| C 2/m, Z = 6 (2/m, m)     | 1  |
| P 21 21 21, Z = 8 (1, 1)  | 1  |
| C c, Z = 4 (1)            | 1  |
| P 42 b c, Z = 8 (1)       | 1  |

**Table S2. Full list of identified structures containing only centrosymmetric molecules (rms < 0.1 Å), with at least one having non-centrosymmetric crystallographic site symmetry**

**(1) Triclinic (20 structures, 11 with established missed symmetry)**

| Refcode  | Structural Class        | Unconstrained overlay<br>(rms Å, rotation type) |          | Constrained overlay<br>(rms Å, rotation type) |          |                                                                                                               |
|----------|-------------------------|-------------------------------------------------|----------|-----------------------------------------------|----------|---------------------------------------------------------------------------------------------------------------|
| AWAZIH   | P 1, Z = 1 (1)          |                                                 |          |                                               |          | <b>Missed symmetry:</b> P -1, Z = 1 (-1)                                                                      |
| BOPFER   | P -1, Z = 3 (1, -1)     | 0.0194                                          | either   | 0.0194                                        | either   |                                                                                                               |
| BUNDIX   | P -1, Z = 3 (1, -1)     | 0.1092                                          | either   | 0.1092                                        | either   |                                                                                                               |
| CERLOA   | P -1, Z = 4 (1, -1, -1) |                                                 |          |                                               |          | <b>Missed symmetry:</b> P -1, Z = 2 (-1, -1)<br>Cell: 10.416, 10.224, 11.501, 89.80, 84.41, 60.43             |
| ECOBUT   | P -1, Z = 2 (1)         |                                                 |          |                                               |          | <b>Missed symmetry:</b> P -1, Z = 1 (-1)<br>Cell: 8.1835, 9.8676, 11.6664, 81.031, 81.754, 66.919             |
| FESVEF   | P 1, Z = 1 (1)          |                                                 |          |                                               |          | <b>Missed symmetry:</b> P -1, Z = 1 (-1)                                                                      |
| FIFXEX   | P -1, Z = 3 (1, -1)     | 0.0580                                          | either   | 0.0580                                        | either   |                                                                                                               |
| GEKMAK   | P -1, Z = 3 (1, -1)     | 0.0942                                          | either   | 0.0942                                        | either   |                                                                                                               |
| MIDREW   | P -1, Z = 3 (1, -1)     |                                                 |          |                                               |          | <b>Missed symmetry:</b> P -1, Z = 1 (-1)<br>Cell: 10.005, 12.8100 10.3566, 88.44, 89.21, 77.10                |
| MUHXOC   | P 1, Z = 2 (1, 1)       |                                                 |          |                                               |          | <b>Missed symmetry:</b> P -1, Z = 2 (-1, -1)                                                                  |
| NAVNAA   | P 1, Z = 1 (1)          |                                                 |          |                                               |          | <b>Missed symmetry:</b> P -1, Z = 1 (-1)                                                                      |
| PAYZEU   | P 1, Z = 2 (1, 1)       |                                                 |          |                                               |          | <b>Missed symmetry:</b> P -1, Z = 2 (-1, -1)                                                                  |
| QIBDEL   | P -1, Z = 5 (1, 1, -1)  |                                                 |          |                                               |          | <b>Missed symmetry:</b> P -1, Z = 1 (-1)<br>Cell: 9.274, 10.817, 13.441, 87.85, 76.20, 65.38                  |
| RARBAO   | P 1, Z = 1 (1)          |                                                 |          |                                               |          | <b>Missed symmetry:</b> P -1, Z = 1 (-1)                                                                      |
| RAVREM   | P -1, Z = 4 (1, 1)      | 0.0751                                          | improper | 0.0751                                        | improper |                                                                                                               |
| SOMXOH01 | P -1, Z = 4 (1, 1)      | 0.0254                                          | proper   | 0.0254                                        | proper   |                                                                                                               |
| VARFAV   | P -1, Z = 3 (1, -1)     | 0.0455                                          | either   | 0.0455                                        | either   |                                                                                                               |
| WEHFIY   | P -1, Z = 3 (1, -1)     | 0.0643                                          | either   | 0.5121                                        | either   | Difference between shape and type match due to exchange of N3 and C22 in the molecule on the inversion centre |
| XINJOT   | P -1, Z = 3 (1, -1)     | 0.0592                                          | either   | 0.0592                                        | either   |                                                                                                               |
| YEDQUU   | P 1, Z = 1 (1)          |                                                 |          |                                               |          | <b>Missed symmetry:</b> P -1, Z = 1 (-1)                                                                      |

**(2) Monoclinic (129 structures, 14 with established missed symmetry)**

| Refcode  | Structural Class      | Unconstrained overlay<br>(rms Å, rotation type) |        | Constrained overlay<br>(rms Å, rotation type) |        |                                            |
|----------|-----------------------|-------------------------------------------------|--------|-----------------------------------------------|--------|--------------------------------------------|
| ADIPAC05 | P 21/c, Z = 6 (1, -1) | 0.0728                                          | either | 0.0728                                        | either |                                            |
| AJUQOL01 | P 21, Z = 2 (1)       |                                                 |        |                                               |        | <b>Missed symmetry: P 21/c, Z = 2 (-1)</b> |
| ASALPD11 | P 21/c, Z = 4 (1)     | —                                               | —      | —                                             | —      |                                            |
| AZPHEN10 | P 21/c, Z = 4 (1)     | —                                               | —      | —                                             | —      |                                            |
| BAJVIR   | P 21/c, Z = 6 (1, -1) | 0.1157                                          | either | 0.1157                                        | either |                                            |
| BATQIX   | C c, Z = 4 (1)        |                                                 |        |                                               |        | <b>Missed symmetry: C 2/c, Z = 4 (-1)</b>  |
| BCODYN02 | P 21/c, Z = 4 (1)     | —                                               | —      | —                                             | —      |                                            |
| BEJNOT   | P 21/c, Z = 4 (1)     | —                                               | —      | —                                             | —      |                                            |
| BEQWEA   | C 2/c, Z = 8 (1)      | —                                               | —      | —                                             | —      |                                            |
| BIGLIM   | P 21, Z = 2 (1)       |                                                 |        |                                               |        | <b>Missed symmetry: P 21/c, Z = 2 (-1)</b> |
| BIPHNE01 | P 21/c, Z = 6 (1, -1) | 0.0194                                          | either | 0.0194                                        | either |                                            |
| BIWYOV   | P 21/c, Z = 4 (1)     | —                                               | —      | —                                             | —      |                                            |
| BONFIT   | P 21/c, Z = 4 (1)     | —                                               | —      | —                                             | —      |                                            |
| BUCFEC   | P 21/c, Z = 4 (1)     | —                                               | —      | —                                             | —      |                                            |
| BZOBPH   | P 21/c, Z = 4 (1)     | —                                               | —      | —                                             | —      |                                            |
| CACDOA   | P 21/c, Z = 4 (1)     | —                                               | —      | —                                             | —      |                                            |
| CALZAR   | P 21/c, Z = 4 (1)     | —                                               | —      | —                                             | —      |                                            |
| CUSZEV   | P 21/c, Z = 4 (1)     | —                                               | —      | —                                             | —      |                                            |
| DAWVEC   | P 21/c, Z = 4 (1)     | —                                               | —      | —                                             | —      |                                            |
| DAWVIG   | P 21/c, Z = 4 (1)     | —                                               | —      | —                                             | —      |                                            |
| DCLANT10 | P 21/c, Z = 4 (1)     | —                                               | —      | —                                             | —      |                                            |
| DEBCES   | P 21/c, Z = 4 (1)     | —                                               | —      | —                                             | —      |                                            |
| DEPQAQ   | C c, Z = 8 (1, 1)     | 0.4542                                          | proper | 0.4542                                        | proper |                                            |
| DEXBEN   | P 21, Z = 2 (1)       |                                                 |        |                                               |        | <b>Missed symmetry: P 21/c, Z = 2 (-1)</b> |
| DIHDON   | P 21/c, Z = 4 (1)     | —                                               | —      | —                                             | —      |                                            |
| DIMNAP01 | P 21/c, Z = 4 (1)     | —                                               | —      | —                                             | —      |                                            |
| DOTXAL   | P 21/c, Z = 4 (1)     | —                                               | —      | —                                             | —      |                                            |
| DPYBDL   | P 21/c, Z = 4 (1)     | —                                               | —      | —                                             | —      |                                            |
| EGUWUY   | P 21/c, Z = 4 (1)     | —                                               | —      | —                                             | —      |                                            |

|          |                       |        |          |        |          |                                            |
|----------|-----------------------|--------|----------|--------|----------|--------------------------------------------|
| ESALIM   | P 21/c, Z = 4 (1)     | —      | —        | —      | —        |                                            |
| EWOSUE   | P 21/c, Z = 4 (1)     | —      | —        | —      | —        |                                            |
| EZAGOB   | P 21/c, Z = 4 (1)     | —      | —        | —      | —        |                                            |
| FAGLUU   | P 21/c, Z = 4 (1)     | —      | —        | —      | —        |                                            |
| FAHWIU   | P 21/c, Z = 6 (1, -1) | 0.0835 | either   | 0.0835 | either   |                                            |
| FECCOF01 | P 21/c, Z = 4 (1)     | —      | —        | —      | —        |                                            |
| FEDGOK   | P 21/c, Z = 4 (1)     | —      | —        | —      | —        |                                            |
| FEFBIB   | C 2/c, Z = 16 (1, 1)  | 0.0535 | improper | 0.0535 | improper |                                            |
| FEQTIF   | P 21/c, Z = 4 (1)     | —      | —        | —      | —        |                                            |
| FIGWEY   | C c, Z = 4 (1)        |        |          |        |          | <b>Missed symmetry: C 2/c, Z = 4 (-1)</b>  |
| FIPDAJ   | P 21/c, Z = 4 (1)     | —      | —        | —      | —        |                                            |
| FISDAM   | P 21, Z = 2 (1)       |        |          |        |          | <b>Missed symmetry: P 21/c, Z = 2 (-1)</b> |
| FIXPUX   | P 21/c, Z = 4 (1)     | —      | —        | —      | —        |                                            |
| FOJVAC   | P 21, Z = 2 (1)       | —      | —        | —      | —        |                                            |
| FONJUN   | P 21/c, Z = 4 (1)     | —      | —        | —      | —        |                                            |
| FUMAAC   | P 21/c, Z = 6 (1, -1) | 0.0163 | either   | 0.0163 | either   |                                            |
| GAGVAL   | P 21/c, Z = 4 (1)     | —      | —        | —      | —        |                                            |
| GALTES   | P 21/c, Z = 6 (1, -1) | 0.0151 | either   | 0.0151 | either   |                                            |
| GEHTET   | C 2, Z = 4 (1)        |        |          |        |          | <b>Missed symmetry: C 2/c, Z = 4 (-1)</b>  |
| GEHYAT   | P 21/c, Z = 4 (1)     | —      | —        | —      | —        |                                            |
| GICPOX   | P 21/c, Z = 6 (1, -1) | 0.0267 | either   | 0.0267 | either   |                                            |
| HIHTUN   | P 21/c, Z = 4 (1)     | —      | —        | —      | —        |                                            |
| HOMQEF   | P 21/c, Z = 4 (1)     | —      | —        | —      | —        |                                            |
| ICAVEN   | P c, Z = 2 (1)        |        |          |        |          | <b>Missed symmetry: P 21/c, Z = 2 (-1)</b> |
| JAQJAN   | P 21/c, Z = 4 (1)     | —      | —        | —      | —        |                                            |
| JAZSEJ   | P 21/c, Z = 4 (1)     | —      | —        | —      | —        |                                            |
| JIBPUF   | P 21/c, Z = 4 (1)     | —      | —        | —      | —        |                                            |
| KASNEY   | P 21/c, Z = 4 (1)     | —      | —        | —      | —        |                                            |
| KATKOF   | P 21/c, Z = 6 (1, -1) | 0.0645 | either   | 0.0645 | either   |                                            |
| KETYOX   | P 21, Z = 2 (1)       |        |          |        |          | <b>Missed symmetry: P 21/c, Z = 2 (-1)</b> |
| KEVRUZ   | P c, Z = 4 (1, 1)     | 0.0770 | proper   | 0.0770 | proper   |                                            |
| LAYKUS   | P 21/c, Z = 4 (1)     | —      | —        | —      | —        |                                            |
| LIYCOL   | P 21/c, Z = 4 (1)     | —      | —        | —      | —        |                                            |

|          |                           |        |          |        |          |                                                                                            |
|----------|---------------------------|--------|----------|--------|----------|--------------------------------------------------------------------------------------------|
| MEACCU01 | C 2/c, Z = 4 (2)          | —      | —        | —      | —        |                                                                                            |
| METJAW   | P 21/c, Z = 4 (1)         | —      | —        | —      | —        |                                                                                            |
| MHPYFE   | P 21/c, Z = 4 (1)         | —      | —        | —      | —        |                                                                                            |
| MOFORM01 | P 21/c, Z = 6 (1, -1)     | 0.0202 | either   | 0.0202 | either   |                                                                                            |
| MPTZTE10 | P 21/c, Z = 4 (1)         | —      | —        | —      | —        |                                                                                            |
| NAFWOG   | P 21/c, Z = 4 (1)         | —      | —        | —      | —        |                                                                                            |
| NICLAN   | P 21, Z = 2 (1)           |        |          |        |          | <b>Missed symmetry: P 21/c, Z = 2 (-1)</b>                                                 |
| NIDTHC11 | P 21/c, Z = 4 (1)         | —      | —        | —      | —        |                                                                                            |
| NIMAPS01 | P 21/c, Z = 4 (1)         | —      | —        | —      | —        |                                                                                            |
| NIWLAG   | P 21/c, Z = 4 (1)         | —      | —        | —      | —        |                                                                                            |
| OCIZOQ   | P 21/c, Z = 4 (1)         | —      | —        | —      | —        |                                                                                            |
| OFNAPH05 | P 21/c, Z = 6 (1, -1)     | 0.0178 | either   | 0.0178 | either   |                                                                                            |
| PATNUT   | C c, Z = 8 (1, 1)         | 0.0471 | improper | 0.0471 | improper |                                                                                            |
| PDTHBA10 | P 21/c, Z = 6 (1, -1)     | 0.0594 | either   | 0.0594 | either   |                                                                                            |
| PENDAM   | P 21/c, Z = 8 (1, -1, -1) | 0.0187 | either   | 0.0187 | either   |                                                                                            |
|          |                           | 0.0161 | either   | 0.0161 | either   |                                                                                            |
|          |                           | 0.0168 | either   | 0.0168 | either   |                                                                                            |
| PERLEN05 | P 21/c, Z = 4 (1)         | —      | —        | —      | —        |                                                                                            |
| PEWXAQ01 | P 21/c, Z = 4 (1)         | —      | —        | —      | —        |                                                                                            |
| PHENAZ11 | P 21/c, Z = 4 (1)         | —      | —        | —      | —        |                                                                                            |
| PIBXON   | P 21, Z = 2 (1)           |        |          |        |          | <b>Missed symmetry: P 21/c, Z = 2 (-1)</b>                                                 |
| PIDFEN   | P 21/c, Z = 4 (1)         | —      | —        | —      | —        |                                                                                            |
| PIKZEO   | P 21, Z = 2 (1)           |        |          |        |          | <b>Missed symmetry: P 21/c, Z = 2 (-1)</b>                                                 |
| PIPFEZ   | P 21/c, Z = 4 (1)         | —      | —        | —      | —        |                                                                                            |
| PIZDOR   | P 21/c, Z = 4 (1)         |        |          |        |          | <b>Missed symmetry: P 21/c, Z = 2 (-1)</b><br>Cell: 3.3812, 11.5180, 8.3834, 90, 110.2, 90 |
| PORPIN02 | P 21/c, Z = 4 (1)         | —      | —        | —      | —        |                                                                                            |
| POVSEY   | P 21/c, Z = 6 (1, -1)     | 0.7041 | either   | 0.7041 | either   |                                                                                            |
| PYRENE02 | P 21/c, Z = 4 (1)         | —      | —        | —      | —        |                                                                                            |
| PYRENE06 | P 21/c, Z = 4 (1)         | —      | —        | —      | —        |                                                                                            |
| QACSOD   | P 21/c, Z = 4 (1)         | —      | —        | —      | —        |                                                                                            |
| QATTIO   | P 21/c, Z = 4 (1)         | —      | —        | —      | —        |                                                                                            |
| QEMHIA   | P 21, Z = 4 (1, 1)        | 0.0492 | proper   | 0.0492 | proper   |                                                                                            |

|          |                       |        |          |        |          |                                            |
|----------|-----------------------|--------|----------|--------|----------|--------------------------------------------|
| QEWROA   | P 21/c, Z = 4 (1)     | —      | —        | —      | —        |                                            |
| QUATER10 | P 21/c, Z = 4 (1)     | —      | —        | —      | —        |                                            |
| RASVIR   | C c, Z = 8 (1, 1)     | 0.0751 | improper | 0.0751 | improper |                                            |
| REWCUS   | C c, Z = 8 (1, 1)     | 0.0598 | proper   | 0.0598 | proper   |                                            |
| RILNAB   | P c, Z = 2 (1)        |        |          |        |          | <b>Missed symmetry: P 21/c, Z = 2 (-1)</b> |
| SAMRUU   | P 21, Z = 2 (1)       | —      | —        | —      | —        |                                            |
| SEMVEL   | P 21/c, Z = 4 (1)     | —      | —        | —      | —        |                                            |
| SIZYUV   | P 21/c, Z = 4 (1)     | —      | —        | —      | —        |                                            |
| SUSWUY   | P 21/c, Z = 6 (1, -1) | 0.2326 | either   | 0.2326 | either   |                                            |
| TAMXIO   | P 21, Z = 4 (1, 1)    | 0.0304 | improper | 0.0304 | improper |                                            |
| TCYNBZ01 | P 21/c, Z = 4 (1)     | —      | —        | —      | —        |                                            |
| TCYQME02 | C c, Z = 4 (1)        |        |          |        |          | <b>Missed symmetry: C 2/c, Z = 4 (-1)</b>  |
| TEMKOL   | P 21/c, Z = 4 (1)     | —      | —        | —      | —        |                                            |
| TERFUR   | P 21/c, Z = 4 (1)     | —      | —        | —      | —        |                                            |
| TETRAZ01 | P 21/c, Z = 6 (1, -1) | 0.0388 | either   | 0.0388 | either   |                                            |
| TIFFAP   | P 21/c, Z = 4 (1)     | —      | —        | —      | —        |                                            |
| TISZUQ   | P 21/c, Z = 4 (1)     | —      | —        | —      | —        |                                            |
| TMDPDS01 | C 2/m, Z = 6 (2/m, m) | 0.0612 | either   | 0.0612 | either   |                                            |
| TURDUF   | P 21/c, Z = 4 (1)     | —      | —        | —      | —        |                                            |
| TUWYIT   | P 21/c, Z = 6 (1, -1) | 0.0640 | either   | 0.0640 | either   |                                            |
| VINJOR   | P 21/c, Z = 4 (1)     | —      | —        | —      | —        |                                            |
| VIPKIO03 | P 21/c, Z = 4 (1)     | —      | —        | —      | —        |                                            |
| WAGZUA   | P 21/c, Z = 4 (1)     | —      | —        | —      | —        |                                            |
| WATHUU   | P 21/c, Z = 4 (1)     | —      | —        | —      | —        |                                            |
| WIDGEV   | P 21/c, Z = 4 (1)     | —      | —        | —      | —        |                                            |
| WIMFUT   | P 21/c, Z = 4 (1)     | —      | —        | —      | —        |                                            |
| WOWSEG   | P 21/c, Z = 4 (1)     | —      | —        | —      | —        |                                            |
| WUWMAC   | P 21/c, Z = 4 (1)     | —      | —        | —      | —        |                                            |
| XEXLIV   | P 21/c, Z = 4 (1)     | —      | —        | —      | —        |                                            |
| XUJCEK   | P 21/c, Z = 4 (1)     | —      | —        | —      | —        |                                            |
| YATYOH   | P 21/c, Z = 4 (1)     | —      | —        | —      | —        |                                            |
| YECTEF   | P 21/c, Z = 4 (1)     | —      | —        | —      | —        |                                            |
| YUCYOK   | P 21/c, Z = 4 (1)     | —      | —        | —      | —        |                                            |

|          |                       |        |        |        |        |  |
|----------|-----------------------|--------|--------|--------|--------|--|
| ZABGOY   | P 21/c, Z = 4 (1)     | —      | —      | —      | —      |  |
| ZAQZUM   | P 21/c, Z = 4 (1)     | —      | —      | —      | —      |  |
| ZAXDEH   | C c, Z = 4 (1)        | —      | —      | —      | —      |  |
| ZZZKNU01 | P 21/c, Z = 6 (1, -1) | 0.0336 | either | 0.0336 | either |  |

**(3) Orthorhombic (72 structures, 8 with established missed symmetry)**

| Refcode  | Structural Class       | Unconstrained overlay<br>(rms Å, rotation type) |   | Constrained overlay<br>(rms Å, rotation type) |   |                                                        |
|----------|------------------------|-------------------------------------------------|---|-----------------------------------------------|---|--------------------------------------------------------|
| AZOVIU   | P 21 21 2, Z = 4 (1)   | —                                               | — | —                                             | — |                                                        |
| BEWYUY01 | P b c n, Z = 8 (1)     | —                                               | — | —                                             | — |                                                        |
| BIGRIT   | P b c a, Z = 8 (1)     | —                                               | — | —                                             | — |                                                        |
| BOLCUA11 | P b c a, Z = 8 (1)     | —                                               | — | —                                             | — |                                                        |
| BUTMEI   | P n m a, Z = 4 (m)     | —                                               | — | —                                             | — |                                                        |
| CADCEP   | P 21 21 21, Z = 4 (1)  | —                                               | — | —                                             | — |                                                        |
| CAFVAG   | P c a 21, Z = 4 (1)    | —                                               | — | —                                             | — |                                                        |
| CAVREW   | P n m a, Z = 4 (m)     | —                                               | — | —                                             | — |                                                        |
| CEHMAE   | P n a 21, Z = 4 (1)    | —                                               | — | —                                             | — |                                                        |
| CEPDAC01 | P n m a, Z = 4 (m)     | —                                               | — | —                                             | — |                                                        |
| CLMSBC   | P n m a, Z = 4 (m)     | —                                               | — | —                                             | — |                                                        |
| CMSIGB   | P n m a, Z = 4 (m)     | —                                               | — | —                                             | — |                                                        |
| COANUL   | P c a 21, Z = 4 (1)    | —                                               | — | —                                             | — |                                                        |
| CYANAM01 | P b c a, Z = 8 (1)     |                                                 |   |                                               |   | <b>Not centrosymmetric when H atoms are considered</b> |
| DAVFIQ   | P n n 2, Z = 2 (2)     |                                                 |   |                                               |   | <b>Missed symmetry: P n n m, Z = 2 (2/m)</b>           |
| DHBACN   | P 21 21 21, Z = 4 (1)  |                                                 |   |                                               |   | <b>Missed symmetry: P b c a, Z = 4 (-1)</b>            |
| DOGWOL   | P c a 21, Z = 4 (1)    | —                                               | — | —                                             | — |                                                        |
| DPHACT09 | P b c a, Z = 8 (1)     | —                                               | — | —                                             | — |                                                        |
| EABVUY   | P c a 21, Z = 4 (1)    | —                                               | — | —                                             | — |                                                        |
| EPNPHD10 | P c a 21, Z = 4 (1)    | —                                               | — | —                                             | — |                                                        |
| FDMUPD10 | P 21 21 21, Z = 4 (1)  | —                                               | — | —                                             | — |                                                        |
| FEGJOR   | P n a 21, Z = 4 (1)    | —                                               | — | —                                             | — |                                                        |
| FITXIP   | C m c m, Z = 4 (m m 2) | —                                               | — | —                                             | — |                                                        |
| FOHCOU01 | P n m a, Z = 4 (m)     | —                                               | — | —                                             | — |                                                        |

|          |                       |   |   |   |   |                                              |
|----------|-----------------------|---|---|---|---|----------------------------------------------|
| FONGUK   | P n m a, Z = 4 (m)    | — | — | — | — |                                              |
| FUBYIK01 | P n m a, Z = 4 (m)    | — | — | — | — |                                              |
| GEFJK    | P c a 21, Z = 4 (1)   | — | — | — | — |                                              |
| HEXBME11 | P n m a, Z = 4 (m)    | — | — | — | — |                                              |
| HEXCET03 | P n m a, Z = 4 (m)    | — | — | — | — |                                              |
| HONNIH   | P n m a, Z = 4 (m)    | — | — | — | — |                                              |
| IBAYEQ   | P 21 21 21, Z = 4 (1) |   |   |   |   | <b>Missed symmetry: P b c a, Z = 4 (-1)</b>  |
| IBAYIU   | P 21 21 21, Z = 4 (1) |   |   |   |   | <b>Missed symmetry: P b c a, Z = 4 (-1)</b>  |
| JAJSIW   | P c a 21, Z = 4 (1)   | — | — | — | — |                                              |
| JIXWIW   | P n m a, Z = 4 (m)    | — | — | — | — |                                              |
| JOCQUN01 | P 21 21 21, Z = 4 (1) | — | — | — | — |                                              |
| KATTOO   | P n a 21, Z = 4 (1)   | — | — | — | — |                                              |
| KIJDIQ   | P n m a, Z = 4 (m)    | — | — | — | — |                                              |
| KOVSOD01 | P n m a, Z = 4 (m)    | — | — | — | — |                                              |
| KULHEE   | P c a 21, Z = 4 (1)   | — | — | — | — |                                              |
| LEDFUW   | P c a 21, Z = 4 (1)   | — | — | — | — |                                              |
| LEFTEW   | P n m a, Z = 4 (m)    | — | — | — | — |                                              |
| LEGFOS   | P n m a, Z = 4 (m)    | — | — | — | — |                                              |
| LELSEA   | P n a 21, Z = 4 (1)   | — | — | — | — |                                              |
| MOFORM   | P 21 21 21, Z = 4 (1) | — | — | — | — |                                              |
| MSLDNI05 | I b a 2, Z = 4 (2)    |   |   |   |   | <b>Missed symmetry: I b a m, Z = 4 (2/m)</b> |
| MUKSOA   | P c a 21, Z = 4 (1)   | — | — | — | — |                                              |
| NIFHAM   | P 21 21 21, Z = 4 (1) | — | — | — | — |                                              |
| OXAZOL   | I b a 2, Z = 4 (2)    |   |   |   |   | <b>Missed symmetry: I b a m, Z = 4 (2/m)</b> |
| PIBWIN   | P c a 21, Z = 4 (1)   | — | — | — | — |                                              |
| PIGNEY   | P 21 21 21, Z = 4 (1) | — | — | — | — |                                              |
| PIRGOM   | P n a 21, Z = 4 (1)   | — | — | — | — |                                              |
| PIYKAJ   | P b c m, Z = 4 (m)    | — | — | — | — |                                              |
| QEYWIA   | P 21 21 21, Z = 4 (1) | — | — | — | — |                                              |
| RALREC   | P 21 21 21, Z = 4 (1) | — | — | — | — |                                              |
| REMMUS   | P b c a, Z = 8 (1)    | — | — | — | — |                                              |
| REPREK   | P n a 21, Z = 4 (1)   | — | — | — | — |                                              |
| RERWEQ03 | P 21 21 21, Z = 4 (1) |   |   |   |   | <b>Missed symmetry: P b c a, Z = 4 (-1)</b>  |

|          |                          |        |          |        |          |                                             |
|----------|--------------------------|--------|----------|--------|----------|---------------------------------------------|
| RUNLAN   | P n a 21, Z = 4 (1)      | —      | —        | —      | —        |                                             |
| SAFFUA   | P b c a, Z = 8 (1)       | —      | —        | —      | —        |                                             |
| SEBJOY   | P c a 21, Z = 4 (1)      | —      | —        | —      | —        |                                             |
| SENFUM   | P n m a, Z = 4 (m)       | —      | —        | —      | —        |                                             |
| SIPJAC   | P n a 21, Z = 4 (1)      | —      | —        | —      | —        |                                             |
| SIWDEH01 | P n a 21, Z = 4 (1)      | —      | —        | —      | —        |                                             |
| TASPEJ   | P n a 21, Z = 4 (1)      | —      | —        | —      | —        |                                             |
| TMPPDA   | P 21 21 21, Z = 4 (1)    | —      | —        | —      | —        |                                             |
| UCEKIW   | P 21 21 21, Z = 4 (1)    | —      | —        | —      | —        |                                             |
| WEVYAY   | P n a 21, Z = 4 (1)      |        |          |        |          | <b>Missed symmetry: P b c n, Z = 4 (-1)</b> |
| WIZFEQ01 | P 21 21 21, Z = 8 (1, 1) | 0.0083 | improper | 0.0083 | improper |                                             |
| XIFPAD   | P 21 21 21, Z = 4 (1)    | —      | —        | —      | —        |                                             |
| YIMXAT   | P n a 21, Z = 4 (1)      | —      | —        | —      | —        |                                             |
| YOYZIV   | P b c a, Z = 8 (1)       | —      | —        | —      | —        |                                             |
| ZZZTLC01 | P n m a, Z = 4 (m)       | —      | —        | —      | —        |                                             |

**(4) Tetragonal (8 structures, 3 with established missed symmetry)**

| Refcode | Structural Class     | Unconstrained overlay<br>(rms Å, rotation type) |   | Constrained overlay<br>(rms Å, rotation type) |   |                                           |
|---------|----------------------|-------------------------------------------------|---|-----------------------------------------------|---|-------------------------------------------|
| DAZNAR  | P 41 21 2, Z = 8 (1) | —                                               | — | —                                             | — |                                           |
| IWAGUI  | I 41 c d, Z = 8 (2)  | —                                               | — | —                                             | — |                                           |
| KARCOW  | P 41, Z = 4 (1)      | —                                               | — | —                                             | — |                                           |
| NIPKEC  | I -4, Z = 2 (-4)     |                                                 |   |                                               |   | <b>Missed symmetry: I4/m, Z = 2 (4/m)</b> |
| NUPREV  | I -4, Z = 2 (-4)     |                                                 |   |                                               |   | <b>Missed symmetry: I4/m, Z = 2 (4/m)</b> |
| OMOSIL  | P 4/n n c, Z = 4 (4) | —                                               | — | —                                             | — |                                           |
| ZAVLIR  | I -4, Z = 2 (-4)     |                                                 |   |                                               |   | <b>Missed symmetry: I4/m, Z = 2 (4/m)</b> |
| ZEWRAU  | P 42 b c, Z = 8 (1)  | —                                               | — | —                                             | — |                                           |

**(5) Trigonal (5 structures, 1 with established missed symmetry)**

| Refcode | Structural Class    | Unconstrained overlay<br>(rms Å, rotation type) |        | Constrained overlay<br>(rms Å, rotation type) |        |  |
|---------|---------------------|-------------------------------------------------|--------|-----------------------------------------------|--------|--|
| HALPRN  | P -3, Z = 3 (3, -3) | 0.0693                                          | either | 0.0693                                        | either |  |
| HESKOF  | P 3 1 c, Z = 6 (1)  | —                                               | —      | —                                             | —      |  |

|          |                                     |        |          |        |          |                                                           |
|----------|-------------------------------------|--------|----------|--------|----------|-----------------------------------------------------------|
| HYQUIN06 | R $\bar{3}$ , Z = 54 (1, 1, 1)      | 0.0197 | improper | 0.0197 | improper |                                                           |
|          |                                     | 0.0135 | proper   | 0.0135 | proper   |                                                           |
|          |                                     | 0.0212 | improper | 0.0212 | improper |                                                           |
| XEWDUY   | P $\bar{3}$ , Z = 3 (3, $\bar{3}$ ) | 0.0675 | either   | 0.0675 | either   |                                                           |
| XUQMOL   | R 3, Z = 3 (3)                      |        |          |        |          | <b>Missed symmetry:</b> R $\bar{3}$ , Z = 3 ( $\bar{3}$ ) |

**(6) Cubic (1 structure with established missed symmetry)**

|        |                    |  |  |  |  |                                                              |
|--------|--------------------|--|--|--|--|--------------------------------------------------------------|
| FOGRUO | I 2 3, Z = 2 (2 3) |  |  |  |  | <b>Missed symmetry:</b> I m $\bar{3}$ , Z = 2 (m $\bar{3}$ ) |
|--------|--------------------|--|--|--|--|--------------------------------------------------------------|
